# Supplementary material for: Prognostic value of right ventricular dysfunction in aortic regurgitation after transcatheter aortic valve replacement
Source: PubMed Central journal article supplement (PMC11392773; doi:10.3389/fcvm.2024.1424116), 2024-08-30
Supplement: Table1.pdf [file Table1.pdf]

## Supplementary Material

**Supplementary Table 1** Univariable and Multivariable Cox Regression Analyses of  
2-Year Composite End Point

|                                    | Univariate Analysis     |                | Multivariable Analysis  |                |
|------------------------------------|-------------------------|----------------|-------------------------|----------------|
|                                    | HR (95% CI)             | <i>P</i> Value | HR (95% CI)             | <i>P</i> Value |
| Female                             | 0.428 (0.270,<br>0.678) | 0.001          | 0.554 (0.325,<br>0.946) | 0.030          |
| Diabetes mellitus                  | 2.496 (1.809,<br>3.444) | < 0.001        |                         |                |
| Hypercholesterolaemia              | 2.480 (1.808,<br>3.403) | 0.002          |                         |                |
| Stroke or TIA                      | 2.109 (1.370,<br>3.124) | < 0.001        |                         |                |
| STS score                          | 1.140 (1.090,<br>1.192) | < 0.001        |                         |                |
| Left ventricular ejection fraction | 0.956 (0.936,<br>0.975) | < 0.001        |                         |                |
| Left atrial volume index           | 1.016 (1.004,<br>1.029) | 0.012          |                         |                |
| RV–RA gradient                     | 1.029 (1.006,<br>1.053) | 0.014          |                         |                |

|                                          |                         |         |                         |       |
|------------------------------------------|-------------------------|---------|-------------------------|-------|
| TR peak velocity                         | 1.675 (1.354,<br>2.072) | < 0.001 |                         |       |
| New-onset RVD group vs. No RVD<br>group  | 1.973 (1.274,<br>3.055) | < 0.001 | 1.785 (1.013,<br>3.173) | 0.049 |
| Normalized RVD group vs. No RVD<br>group | 3.070 (1.973,<br>4.776) | < 0.001 |                         |       |
| Residual RVD group vs. No RVD<br>group   | 2.991 (1.981,<br>4.517) | < 0.001 |                         |       |
| TAPSE                                    | 0.607 (0.446,<br>0.825) | 0.001   |                         |       |

---

RVD: right ventricular dysfunction; TIA: transient ischemic attack; STS: Society of Thoracic Surgeons; RV: right ventricle; RA: right atrium; TAPSE: tricuspid annular plane systolic excursion; TR: tricuspid regurgitation.

**Supplementary Table 2** Univariable and Multivariable Logistic Regression Analyses

of No Right Ventricular Dysfunction

|                                                        | Univariate Analysis   |         | Multivariable Analysis |         |
|--------------------------------------------------------|-----------------------|---------|------------------------|---------|
|                                                        | HR (95% CI)           | P Value | HR (95% CI)            | P Value |
| <b>Preprocedural FAC &lt; 35% as a binary variable</b> |                       |         |                        |         |
| Body mass index                                        | 0.913(0.855,0.974)    | 0.006   |                        |         |
| Body surface area                                      | 0.352(0.140,0.868)    | 0.025   |                        |         |
| STS score                                              | 1.073(1.004,1.147)    | 0.038   | 1.187(1.029,1.391)     | 0.025   |
| LVEDV                                                  | 1.030(1.008,1.053)    | 0.007   | 0.702(0.528,0.885)     | 0.007   |
| LVESV                                                  | 1.102(1.066,1.140)    | < 0.001 |                        |         |
| Left ventricular ejection fraction                     | 0.881(0.844,0.918)    | < 0.001 | 0.561(0.357,0.880)     | 0.012   |
| LA volume index                                        | 1.052(1.032,1.074)    | < 0.001 |                        |         |
| Tricuspid regurgitation $\geq$ moderate                | 21.923(12.800,38.742) | < 0.001 |                        |         |

|                                                            |                        |         |                        |         |
|------------------------------------------------------------|------------------------|---------|------------------------|---------|
| Systolic pulmonary artery pressure                         | 1.167(1.133,1<br>.207) | < 0.001 | 1.087(1.038,1<br>.141) | 0.001   |
| RV–RA gradient                                             | 1.092(1.053,1<br>.135) | < 0.001 |                        |         |
| TR peak velocity                                           | 5.983(3.813,9<br>.695) | < 0.001 |                        |         |
| RV basal diameter                                          | 0.821(0.781,0<br>.858) | < 0.001 | 0.880(0.823,0<br>.935) | < 0.001 |
| <b>Preprocedural FAC &lt; 35% as a continuous variable</b> |                        |         |                        |         |
| Body mass index                                            | 0.913(0.855,0<br>.974) | 0.006   |                        |         |
| Body surface area                                          | 0.352(0.140,0<br>.868) | 0.025   |                        |         |
| STS score                                                  | 1.073(1.004,1<br>.147) | 0.038   | 1.190(1.030,1<br>.398) | 0.025   |
| LVEDV                                                      | 1.030(1.008,1<br>.053) | 0.007   | 0.724(0.541,0<br>.920) | 0.016   |
| LVESV                                                      | 1.102(1.066,1<br>.140) | < 0.001 |                        |         |
| Left ventricular ejection fraction                         | 0.881(0.844,0<br>.918) | < 0.001 | 0.550(0.349,0<br>.863) | 0.009   |

|                                                             |                           |         |                        |         |
|-------------------------------------------------------------|---------------------------|---------|------------------------|---------|
| LA volume index                                             | 1.052(1.032,1<br>.074)    | < 0.001 |                        |         |
| Tricuspid regurgitation $\geq$ moderate                     | 21.923(12.80<br>0,38.742) | < 0.001 |                        |         |
| Systolic pulmonary artery pressure                          | 1.167(1.133,1<br>.207)    | < 0.001 | 1.086(1.038,1<br>.140) | 0.001   |
| RV–RA gradient                                              | 1.092(1.053,1<br>.135)    | < 0.001 |                        |         |
| TR peak velocity                                            | 5.983(3.813,9<br>.695)    | < 0.001 |                        |         |
| RV basal diameter                                           | 0.821(0.781,0<br>.858)    | < 0.001 | 0.887(0.830,0<br>.943) | < 0.001 |
| <b>Preprocedural TAPSE &lt; 1.7 cm as a binary variable</b> |                           |         |                        |         |
| Body mass index                                             | 0.913(0.855,0<br>.974)    | 0.006   |                        |         |
| Body surface area                                           | 0.352(0.140,0<br>.868)    | 0.025   |                        |         |
| STS score                                                   | 1.073(1.004,1<br>.147)    | 0.038   | 1.180(1.026,1<br>.378) | 0.027   |
| LVEDV                                                       | 1.030(1.008,1<br>.053)    | 0.007   | 0.684(0.518,0<br>.859) | 0.003   |

|                                                                 |                           |         |                        |         |
|-----------------------------------------------------------------|---------------------------|---------|------------------------|---------|
| LVESV                                                           | 1.102(1.066,1<br>.140)    | < 0.001 |                        |         |
| Left ventricular ejection fraction                              | 0.881(0.844,0<br>.918)    | < 0.001 | 0.521(0.332,0<br>.811) | 0.004   |
| LA volume index                                                 | 1.052(1.032,1<br>.074)    | < 0.001 |                        |         |
| Tricuspid regurgitation $\geq$ moderate                         | 21.923(12.80<br>0,38.742) | < 0.001 |                        |         |
| Systolic pulmonary artery pressure                              | 1.167(1.133,1<br>.207)    | < 0.001 | 1.100(1.052,1<br>.154) | < 0.001 |
| RV–RA gradient                                                  | 1.092(1.053,1<br>.135)    | < 0.001 |                        |         |
| TR peak velocity                                                | 5.983(3.813,9<br>.695)    | < 0.001 |                        |         |
| RV basal diameter                                               | 0.821(0.781,0<br>.858)    | < 0.001 | 0.867(0.812,0<br>.920) | < 0.001 |
| <b>Preprocedural TAPSE &lt; 1.7 cm as a continuous variable</b> |                           |         |                        |         |
| Body mass index                                                 | 0.913(0.855,0<br>.974)    | 0.006   |                        |         |
| Body surface area                                               | 0.352(0.140,0<br>.868)    | 0.025   |                        |         |

|                                         |                           |         |                        |         |
|-----------------------------------------|---------------------------|---------|------------------------|---------|
| STS score                               | 1.073(1.004,1<br>.147)    | 0.038   | 1.179(1.022,1<br>.379) | 0.031   |
| LVEDV                                   | 1.030(1.008,1<br>.053)    | 0.007   | 0.685(0.515,0<br>.865) | 0.004   |
| LVESV                                   | 1.102(1.066,1<br>.140)    | < 0.001 |                        |         |
| Left ventricular ejection fraction      | 0.881(0.844,0<br>.918)    | < 0.001 | 0.509(0.324,0<br>.794) | 0.003   |
| LA volume index                         | 1.052(1.032,1<br>.074)    | < 0.001 |                        |         |
| Tricuspid regurgitation $\geq$ moderate | 21.923(12.80<br>0,38.742) | < 0.001 |                        |         |
| Systolic pulmonary artery pressure      | 1.167(1.133,1<br>.207)    | < 0.001 | 1.103(1.054,1<br>.158) | < 0.001 |
| RV–RA gradient                          | 1.092(1.053,1<br>.135)    | < 0.001 |                        |         |
| TR peak velocity                        | 5.983(3.813,9<br>.695)    | < 0.001 |                        |         |
| RV basal diameter                       | 0.821(0.781,0<br>.858)    | < 0.001 | 0.869(0.814,0<br>.923) | < 0.001 |

**Preprocedural S' < 9.5 cm/s as a binary variable**

|                                         |                           |         |                        |         |
|-----------------------------------------|---------------------------|---------|------------------------|---------|
| Body mass index                         | 0.913(0.855,0<br>.974)    | 0.006   |                        |         |
| Body surface area                       | 0.352(0.140,0<br>.868)    | 0.025   |                        |         |
| STS score                               | 1.073(1.004,1<br>.147)    | 0.038   | 1.181(1.027,1<br>.379) | 0.026   |
| LVEDV                                   | 1.030(1.008,1<br>.053)    | 0.007   | 0.680(0.515,0<br>.854) | 0.003   |
| LVESV                                   | 1.102(1.066,1<br>.140)    | < 0.001 |                        |         |
| Left ventricular ejection fraction      | 0.881(0.844,0<br>.918)    | < 0.001 | 0.519(0.331,0<br>.808) | 0.004   |
| LA volume index                         | 1.052(1.032,1<br>.074)    | < 0.001 |                        |         |
| Tricuspid regurgitation $\geq$ moderate | 21.923(12.80<br>0,38.742) | < 0.001 |                        |         |
| Systolic pulmonary artery pressure      | 1.167(1.133,1<br>.207)    | < 0.001 | 1.099(1.052,1<br>.154) | < 0.001 |
| RV–RA gradient                          | 1.092(1.053,1<br>.135)    | < 0.001 |                        |         |
| TR peak velocity                        | 5.983(3.813,9<br>.695)    | < 0.001 |                        |         |



|                                                                |                           |         |                        |         |
|----------------------------------------------------------------|---------------------------|---------|------------------------|---------|
| RV basal diameter                                              | 0.821(0.781,0<br>.858)    | < 0.001 | 0.867(0.812,0<br>.920) | < 0.001 |
| <b>Preprocedural S' &lt; 9.5 cm/s as a continuous variable</b> |                           |         |                        |         |
| Body mass index                                                | 0.913(0.855,0<br>.974)    | 0.006   |                        |         |
| Body surface area                                              | 0.352(0.140,0<br>.868)    | 0.025   |                        |         |
| STS score                                                      | 1.073(1.004,1<br>.147)    | 0.038   | 1.184(1.029,1<br>.383) | 0.025   |
| LVEDV                                                          | 1.030(1.008,1<br>.053)    | 0.007   | 0.681(0.516,0<br>.855) | 0.003   |
| LVESV                                                          | 1.102(1.066,1<br>.140)    | < 0.001 |                        |         |
| Left ventricular ejection fraction                             | 0.881(0.844,0<br>.918)    | < 0.001 | 0.514(0.327,0<br>.802) | 0.004   |
| LA volume index                                                | 1.052(1.032,1<br>.074)    | < 0.001 |                        |         |
| Tricuspid regurgitation $\geq$ moderate                        | 21.923(12.80<br>0,38.742) | < 0.001 |                        |         |
| Systolic pulmonary artery pressure                             | 1.167(1.133,1<br>.207)    | < 0.001 | 1.100(1.052,1<br>.154) | < 0.001 |

|                   |                        |         |                        |         |
|-------------------|------------------------|---------|------------------------|---------|
| RV-RA gradient    | 1.092(1.053,1<br>.135) | < 0.001 |                        |         |
| TR peak velocity  | 5.983(3.813,9<br>.695) | < 0.001 |                        |         |
| RV basal diameter | 0.821(0.781,0<br>.858) | < 0.001 | 0.866(0.811,0<br>.919) | < 0.001 |

---

STS: Society of Thoracic Surgeons; LA: left atrium; LVEDV: left ventricular end-diastolic volume; LVESV: left ventricular end-systolic volume; FAC: fraction area change; S': right ventricular lateral systolic motion using tissue doppler imaging; TAPSE: tricuspid annular plane systolic excursion; RV: right ventricle; RA: right atrium; TR: tricuspid regurgitation.

**Supplementary Table 3** Univariable and Multivariable Logistic Regression Analyses  
of Residual Right Ventricular Dysfunction

|                                                            | Univariate Analysis |                | Multivariable Analysis |                |
|------------------------------------------------------------|---------------------|----------------|------------------------|----------------|
|                                                            | HR (95% CI)         | <i>P</i> Value | HR (95% CI)            | <i>P</i> Value |
| <b>Preprocedural FAC &lt; 35% as a binary variable</b>     |                     |                |                        |                |
| Coronary artery disease                                    | 0.475(0.241,0.914)  | 0.021          |                        |                |
| Permanent pacemaker implantation                           | 0.204(0.011,1.230)  | 0.045          |                        |                |
| EuroSCORE                                                  | 0.892(0.801,0.989)  | 0.023          | 0.926(0.817,1.044)     | 0.032          |
| Left ventricular ejection fraction                         | 1.980(1.739,2.022)  | 0.031          |                        |                |
| E/e'                                                       | 2.702(1.590,3.824)  | 0.024          |                        |                |
| Tricuspid regurgitation $\geq$ moderate                    | 1.731(0.909,3.320)  | 0.046          |                        |                |
| Systolic pulmonary artery pressure                         | 1.033(0.988,1.080)  | 0.008          | 1.238(0.592,2.641)     | 0.017          |
| <b>Preprocedural FAC &lt; 35% as a continuous variable</b> |                     |                |                        |                |
| Coronary artery disease                                    | 0.475(0.241,0.914)  | 0.021          | 0.609(0.279,1.313)     | 0.028          |

|                                                             |                        |       |                        |       |
|-------------------------------------------------------------|------------------------|-------|------------------------|-------|
| Permanent pacemaker implantation                            | 0.204(0.011,1<br>.230) | 0.045 |                        |       |
| EuroSCORE                                                   | 0.892(0.801,0<br>.989) | 0.023 | 0.927(0.819,1<br>.046) | 0.032 |
| Left ventricular ejection fraction                          | 1.980(1.739,2<br>.022) | 0.031 |                        |       |
| E/e'                                                        | 2.702(1.590,3<br>.824) | 0.024 |                        |       |
| Tricuspid regurgitation $\geq$ moderate                     | 1.731(0.909,3<br>.320) | 0.046 |                        |       |
| Systolic pulmonary artery pressure                          | 1.033(0.988,1<br>.080) | 0.008 | 0.984(0.911,1<br>.062) | 0.015 |
| <b>Preprocedural TAPSE &lt; 1.7 cm as a binary variable</b> |                        |       |                        |       |
| Coronary artery disease                                     | 0.475(0.241,0<br>.914) | 0.021 | 0.606(0.277,1<br>.305) | 0.023 |
| Permanent pacemaker implantation                            | 0.204(0.011,1<br>.230) | 0.045 |                        |       |
| EuroSCORE                                                   | 0.892(0.801,0<br>.989) | 0.023 | 0.930(0.822,1<br>.049) | 0.029 |
| Left ventricular ejection fraction                          | 1.980(1.739,2<br>.022) | 0.031 |                        |       |

|                                         |                        |       |                        |       |
|-----------------------------------------|------------------------|-------|------------------------|-------|
| E/e'                                    | 2.702(1.590,3<br>.824) | 0.024 |                        |       |
| Tricuspid regurgitation $\geq$ moderate | 1.731(0.909,3<br>.320) | 0.046 |                        |       |
| Systolic pulmonary artery pressure      | 1.033(0.988,1<br>.080) | 0.008 | 1.242(0.601,2<br>.619) | 0.017 |

**Preprocedural TAPSE < 1.7 cm as a continuous variable**

|                                         |                        |       |                        |       |
|-----------------------------------------|------------------------|-------|------------------------|-------|
| Coronary artery disease                 | 0.475(0.241,0<br>.914) | 0.021 | 0.602(0.275,1<br>.299) | 0.029 |
| Permanent pacemaker implantation        | 0.204(0.011,1<br>.230) | 0.045 |                        |       |
| EuroSCORE                               | 0.892(0.801,0<br>.989) | 0.023 | 0.929(0.821,1<br>.048) | 0.042 |
| Left ventricular ejection fraction      | 1.980(1.739,2<br>.022) | 0.031 |                        |       |
| E/e'                                    | 2.702(1.590,3<br>.824) | 0.024 |                        |       |
| Tricuspid regurgitation $\geq$ moderate | 1.731(0.909,3<br>.320) | 0.046 |                        |       |
| Systolic pulmonary artery pressure      | 1.033(0.988,1<br>.080) | 0.008 | 1.022(0.447,2<br>.339) | 0.009 |

**Preprocedural S' < 9.5 cm/s as a binary variable**

|                                                                |                        |       |                        |       |
|----------------------------------------------------------------|------------------------|-------|------------------------|-------|
| Coronary artery disease                                        | 0.475(0.241,0<br>.914) | 0.021 | 0.601(0.274,1<br>.294) | 0.026 |
| Permanent pacemaker implantation                               | 0.204(0.011,1<br>.230) | 0.045 |                        |       |
| EuroSCORE                                                      | 0.892(0.801,0<br>.989) | 0.023 | 0.921(0.812,1<br>.040) | 0.028 |
| Left ventricular ejection fraction                             | 1.980(1.739,2<br>.022) | 0.031 |                        |       |
| E/e'                                                           | 2.702(1.590,3<br>.824) | 0.024 |                        |       |
| Tricuspid regurgitation $\geq$ moderate                        | 1.731(0.909,3<br>.320) | 0.046 |                        |       |
| Systolic pulmonary artery pressure                             | 1.033(0.988,1<br>.080) | 0.008 | 1.144(1.090,1<br>.406) | 0.016 |
| <b>Preprocedural S' &lt; 9.5 cm/s as a continuous variable</b> |                        |       |                        |       |
| Coronary artery disease                                        | 0.475(0.241,0<br>.914) | 0.021 | 0.594(0.271,1<br>.280) | 0.028 |
| Permanent pacemaker implantation                               | 0.204(0.011,1<br>.230) | 0.045 |                        |       |
| EuroSCORE                                                      | 0.892(0.801,0<br>.989) | 0.023 | 0.923(0.815,1<br>.042) | 0.030 |

|                                         |                        |       |                        |       |
|-----------------------------------------|------------------------|-------|------------------------|-------|
| Left ventricular ejection fraction      | 1.980(1.739,2<br>.022) | 0.031 |                        |       |
| E/e'                                    | 2.702(1.590,3<br>.824) | 0.024 |                        |       |
| Tricuspid regurgitation $\geq$ moderate | 1.731(0.909,3<br>.320) | 0.046 |                        |       |
| Systolic pulmonary artery pressure      | 1.033(0.988,1<br>.080) | 0.008 | 1.053(0.950,1<br>.171) | 0.013 |

---

EuroSCORE: European System for Cardiac Operative Risk Evaluation.
